# Supplementary material for: Translocation and the alternative D-galacturonate pathway contribute to increasing the ascorbate level in ripening tomato fruits together with the D-mannose/L-galactose pathway
Source: PubMed Central journal article supplement — J Exp Bot. 2011 Oct 6;63(1):229–39. doi: 10.1093/jxb/err275 (PMC3245467; doi:10.1093/jxb/err275), 2011-10-06
Supplement: supp_err275_00065441-file001.pdf [file supp_err275_00065441-file001.pdf]

1 **Supplemental Figures**

2

3 **Fig. S1**

4 Effect of Suc feeding on AsA content and AsA biosynthesis genes expression of  
5 Micro-Tom fruits. A, The AsA contents of fruits at the immature green (IMG),  
6 breaker (BR) and orange (OR) stages of ripening fed with Suc and incubated under  
7 continuous light for 48 h. Values are mean  $\pm$  SE ( $n=3$ ). Statistical significance of  
8 AsA were compared to the control fruits fed with H<sub>2</sub>O using the *t*-test; \* $p<0.05$  and  
9 \*\* $p<0.01$ . B, The expression level of genes in the D-man/L-Gal pathway for the  
10 biosynthesis of AsA. Total RNA were isolated from the above fruits and transcribed  
11 into cDNA for use in real time PCR. The expression levels were normalized to  
12 elongation factor 1 alpha.

13

14

15 **Fig. S2**

16 The distribution of labeled L-[6-<sup>14</sup>C]AsA in tomato fruits (shown in Fig. 5C and D) at  
17 immature green (IMG), mature green (MG) and red (RD) stages of ripening  
18 expressed as disintegration per minute per gram dry weight.

19

20

21

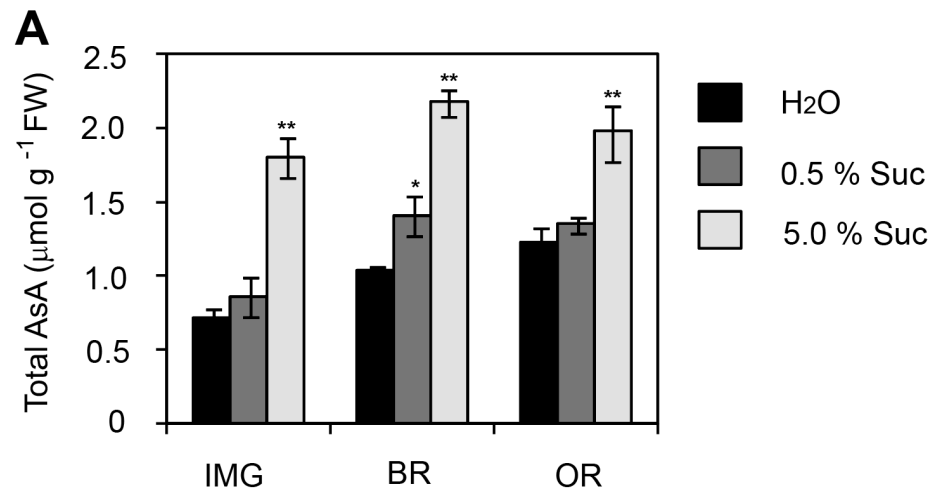

**Fig. S1**

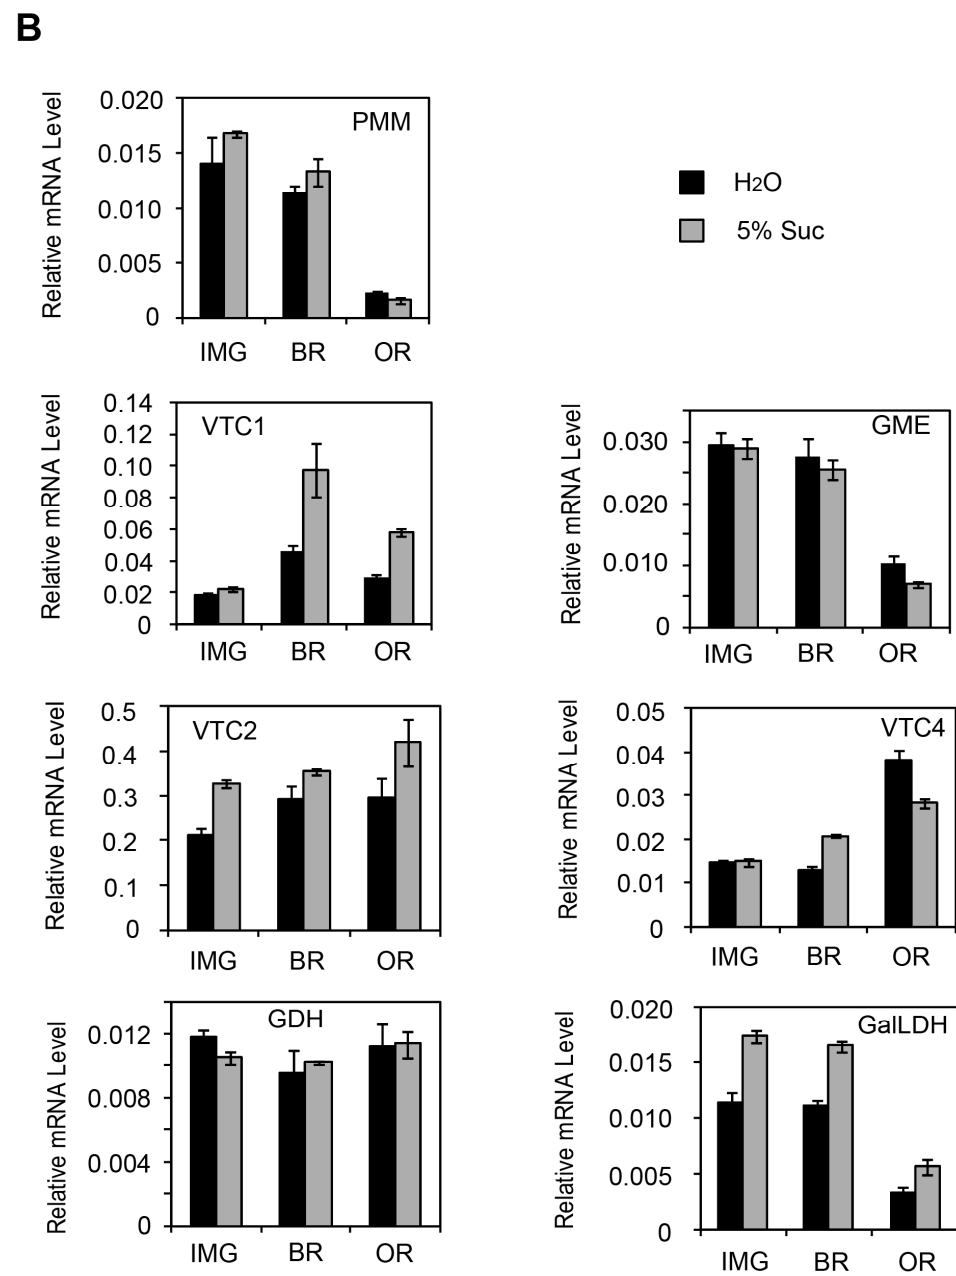

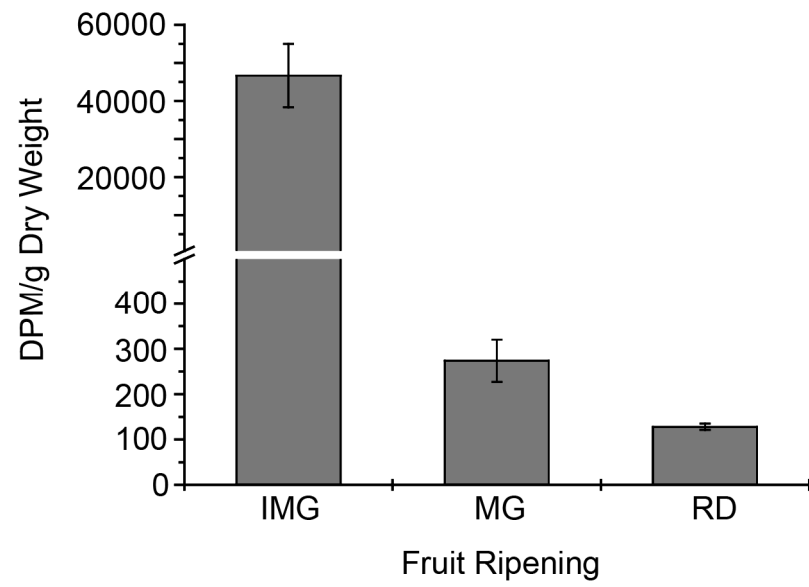

**Fig. S2**
